# Supplementary material for: De Novo Origin of Human Protein-Coding Genes
Source: PubMed Central journal article supplement (PMC3213175; doi:10.1371/journal.pgen.1002379), 2011-11-10

## Expression level

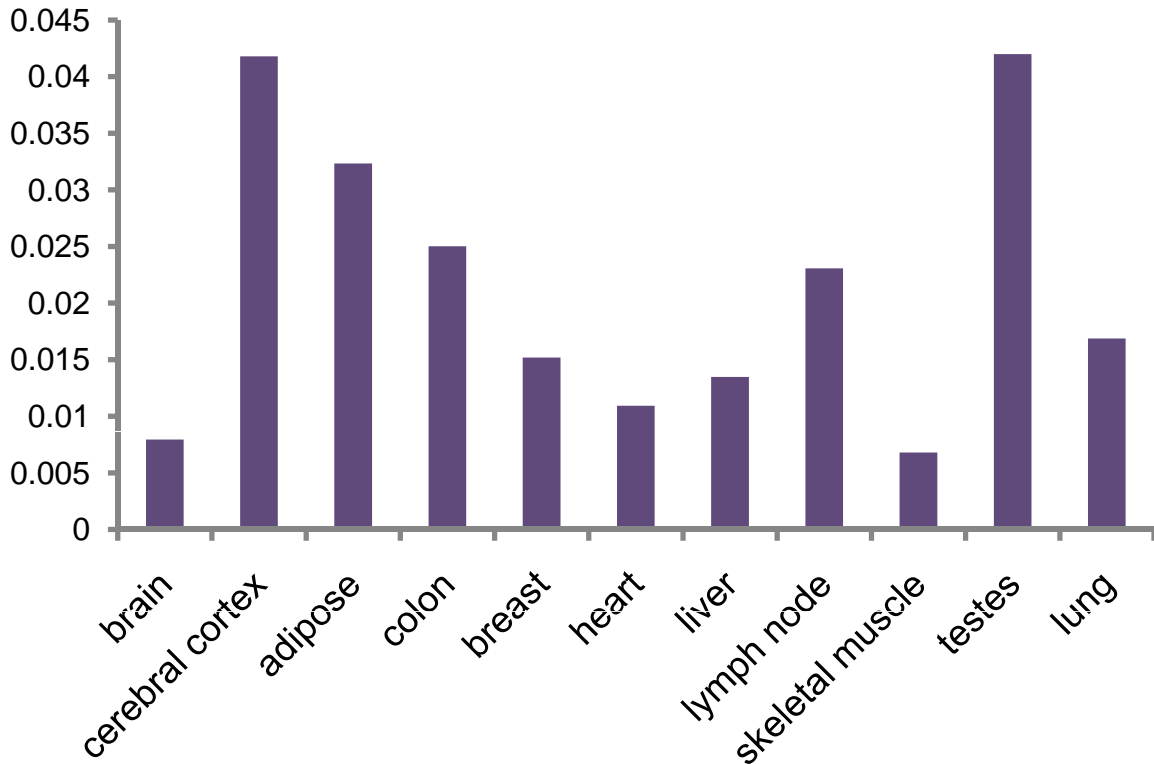

Supplement: pgen.1002379.s002.pdf [file pgen.1002379.s002.pdf]
