# Supplementary material for: De Novo Origin of Human Protein-Coding Genes
Source: PubMed Central journal article supplement (PMC3213175; doi:10.1371/journal.pgen.1002379), 2011-11-10

**Normalized expression level**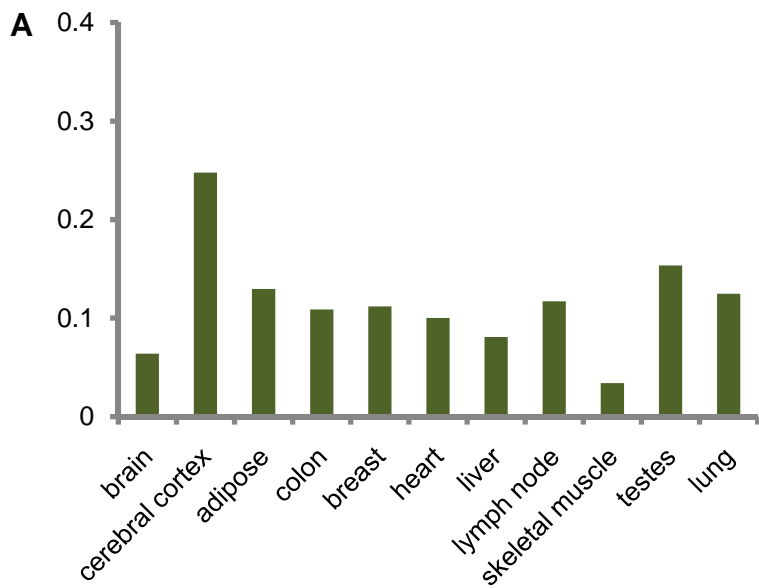**Proportion of genes having expression**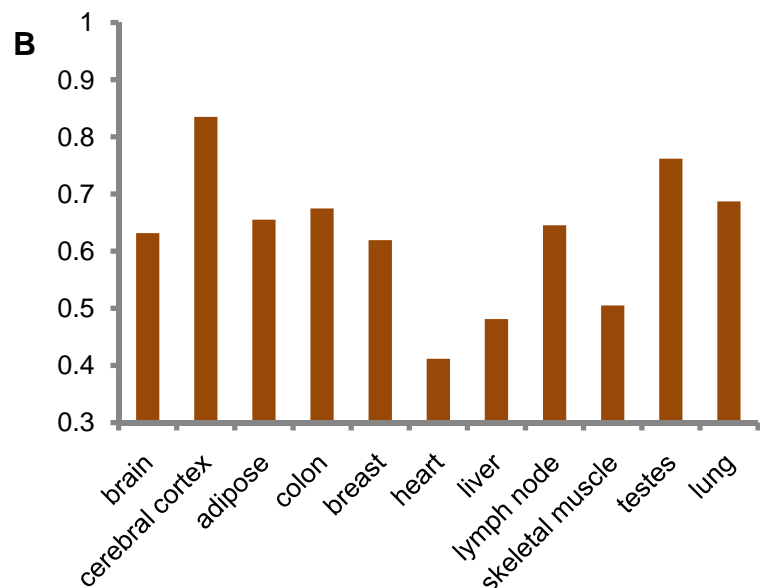**Proportion of gene having highest expression**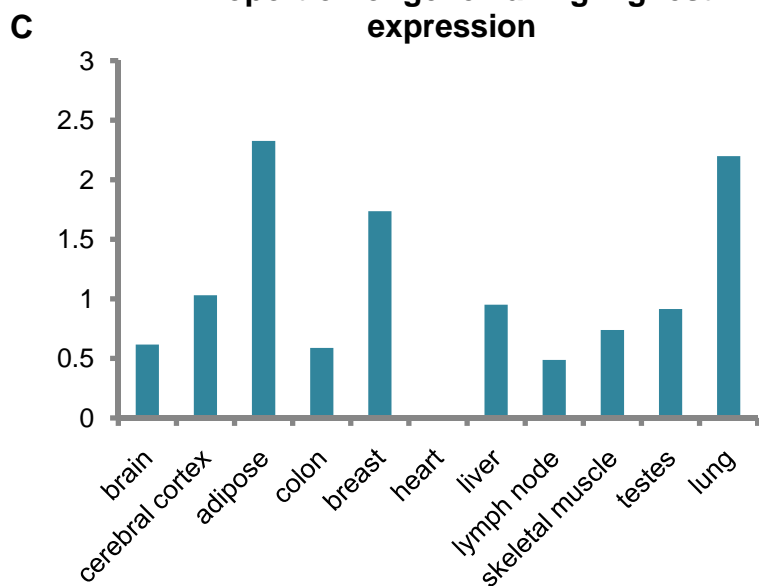**Expression level**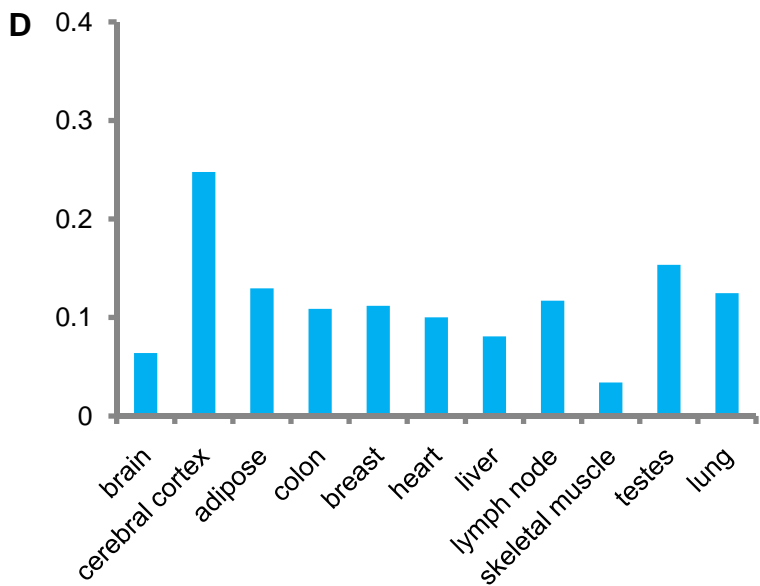

Supplement: pgen.1002379.s004.pdf [file pgen.1002379.s004.pdf]
